# Supplementary material for: The attitudes, beliefs and behaviours of GPs regarding exercise for chronic knee pain: a systematic review
Source: Springer Nature journal article supplement (doi:10.1186/1471-2296-11-4), 2010-01-18
Supplement: Additional file 3 [file 1471-2296-11-4-s3.doc]

## Quality appraisal of papers found using The NCAW

| **Item being examined ** | **Research question** | | | **Study type** | | | **Outcome factors** | | | **Confounders** | | | **Sampling** | | | **Internal validity** | | | **Statistical tests** | | | **Significant results (clin/socially)** | | | **Ethical issues** | | | **Conclusions** | | |
| --- | --- | --- | --- | --- | --- | --- | --- | --- | --- | --- | --- | --- | --- | --- | --- | --- | --- | --- | --- | --- | --- | --- | --- | --- | --- | --- | --- | --- | --- | --- |
| **Author ** | **1** | **2** | **3** | **1** | **2** | **3** | **1** | **2** | **3** | **1** | **2** | **3** | **1** | **2** | **3** | **1** | **2** | **3** | **1** | **2** | **3** | **1** | **2** | **3** | **1** | **2** | **3** | **1** | **2** | **3** |
| **Bedson** | Y | N | N | Y | N | N | Y | N | N | N | Y | Y | Y | N | N | Y | Y | Y | Y | N | N | Y | N | N | N | N | N | Y | N | N |
| **De Bock** | Y | N | N | Y | N | N | Y | N | N | N | Y | Y | Y | Y | Y | N | Y | Y | Y | N | N | Y | N | N | N | N | N | Y | Y | Y |
| **Chard** | Y | N | N | Y | N | N | Y | Y | Y | N | Y | Y | Y | Y | Y | Y | Y | Y | Y | N | N | N | Y | Y | N | N | N | N | N | N |
| **Chevalier** | Y | N | N | Y | N | N | Y | Y | Y | N | Y | Y | Y | Y | Y | Y | N | N | N | N | N | Y | N | N | N | N | N | Y | N | N |
| **Coyte** | Y | N | N | Y | N | N | Y | Y | Y | N | Y | Y | Y | Y | Y | Y | Y | Y | Y | N | N | Y | N | N | Y | N | N | Y | N | N |
| **Denoeud** | Y | N | N | Y | N | N | Y | N | N | N | Y | Y | Y | N | N | Y | N | N | Y | N | N | Y | N | N | N | N | N | Y | N | N |
| **Dexter** | Y | N | N | Y | N | N | Y | N | N | Y | N | N | Y | Y | Y | Y | Y | Y | Y | N | N | Y | N | N | N | N | N | Y | N | N |
| **Glazier** | Y | N | N | Y | N | N | Y | Y | Y | N | Y | Y | Y | N | N | Y | N | Y | Y | Y | Y | Y | N | N | N | N | N | Y | N | N |
| **Günaydin** | Y | N | N | Y | N | N | Y | N | N | Y | N | N | Y | Y | Y | Y | Y | Y | Y | N | N | Y | N | N | N | N | N | Y | N | N |
| **Hendry** | Y | N | N | Y | N | N | N/A | N | N | N/A | N | N | Y | Y | Y | N/A | N | N | N/A | N | N | Y | N | N | Y | N | N | Y | N | N |
| **Jordon** | Y | N | N | Y | N | N | Y | N | N | Y | N | N | Y | Y | Y | Y | Y | Y | Y | N | N | Y | N | N | Y | N | N | Y | N | N |
| **Linsell** | Y | N | N | Y | N | N | Y | N | N | N | Y | Y | Y | N | N | Y | N | N | Y | N | N | Y | N | N | Y | N | N | Y | N | N |
| **Mamlin** | Y | N | N | Y | N | N | Y | Y | Y | N | Y | Y | Y | N | N | Y | Y | Y | Y | N | N | Y | N | N | N | N | N | Y | N | N |
| **Mazieres** | Y | N | N | Y | N | N | Y | N | N | N | Y | Y | Y | Y | Y | Y | Y | Y | Y | N | N | Y | N | N | N | N | N | Y | N | N |
| **Mazzuca** | Y | N | N | Y | N | N | Y | N | N | Y | N | N | Y | Y | Y | Y | Y | Y | Y | N | N | Y | N | N | N | N | N | Y | N | N |
| **McHugh** | Y | N | N | Y | N | N | Y | N | N | N | Y | Y | Y | Y | Y | Y | Y | Y | Y | N | N | Y | N | N | Y | N | N | Y | N | N |
| **Mitchell** | Y | N | N | Y | N | N | Y | N | N | N | Y | Y | Y | Y | Y | Y | Y | Y | Y | N | N | Y | N | N | Y | N | N | Y | N | N |
| **Pavelka** | Y | N | N | Y | N | N | Y | Y | Y | Y | N | N | Y | Y | Y | N | Y | Y | Y | N | N | Y | N | N | N | N | N | Y | N | N |
| **Porcheret** | Y | N | N | Y | N | N | Y | N | N | N | N | N | Y | Y | Y | Y | Y | Y | Y | N | N | Y | N | N | Y | N | N | Y | N | N |
| **Sarzi-Puttini** | Y | N | N | Y | N | Y | Y | Y | Y | N | Y | Y | N | Y | Y | N | Y | Y | N | Y | Y | Y | N | N | N | N | N | Y | N | N |
| **For each aspect of the quality appraisal three questions were asked, each number in the above table corresponds to each question:**   1. **Can you find this information in the paper? 2. Is the way this was done a problem? 3. Does this problem threaten the validity of the study?** | | | | | | | | | | | | | | | | | | | | | | | | | | | | | | |
